# Supplementary material for: Nonsteroidal anti-inflammatory drugs and acetaminophen ameliorate muscular mechanical hyperalgesia developed after lengthening contractions via cyclooxygenase-2 independent mechanisms in rats
Source: PLoS One. 2019 Nov 6;14(11):e0224809. doi: 10.1371/journal.pone.0224809 (PMC6834261; doi:10.1371/journal.pone.0224809)
Supplement: S1 Table — (XLSX) [file pone.0224809.s001.xlsx]

## Sheet: Sheet1
	Rats	Groups	Hours after LC
			Pre	24	48	72
	1	Sham	179.38	195.26	220.74	197.32
	2	Sham	172.62	178.38	184.06	172.76
	3	Sham	196.48	205.46	188.9	186.54
	4	Sham	188.96	171.06	183.32	207.84
	5	Sham	180.26	175.5	200	184.2
	6	Sham	180.16	197.18	184.2	173.32
	1	LC	196.88	171.74	198.66	187.96
	2	LC	182.14	145.02	154.78	160.82
	3	LC	206.22	177.94	180	188.42
	4	LC	177.96	138.36	140.96	180.98
	5	LC	175.64	148.46	159.2	171.08
	6	LC	171	163.28	169.32	180.5
