# Supplementary material for: Nonsteroidal anti-inflammatory drugs and acetaminophen ameliorate muscular mechanical hyperalgesia developed after lengthening contractions via cyclooxygenase-2 independent mechanisms in rats
Source: PLoS One. 2019 Nov 6;14(11):e0224809. doi: 10.1371/journal.pone.0224809 (PMC6834261; doi:10.1371/journal.pone.0224809)
Supplement: S2 Table — (XLSX) [file pone.0224809.s002.xlsx]

## Sheet: Sheet1
	Rats	Groups	Hours after LC
			Pre	24	25	26	27	28
	1	Vehicle	222.62	180.42	172.46	159.9	168.58	164.76
	2	Vehicle	232.54	171.86	177.5	187.06	183.74	171.88
	3	Vehicle	224.56	189.74	175.92	169.68	185.48	164.58
	4	Vehicle	209.82	156.54	153.28	158.58	165.16	176.66
	5	Vehicle	210.68	162.64	152.78	162.6	151.48	171.78
	6	Vehicle	221.3	187.66	186.58	165.06	171.02	169.04
	1	Pre-LC celecoxib	234.66	222.76	217.4	207.56	223.78	217.56
	2	Pre-LC celecoxib	229.38	225.76	217.54	202	223.3	198.54
	3	Pre-LC celecoxib	203.08	210.52	204.6	212.26	205.22	206.36
	4	Pre-LC celecoxib	228.98	213.22	213.08	195.24	230.4	215.04
	5	Pre-LC celecoxib	205.8	205.8	197.72	202	203	200.92
	6	Pre-LC celecoxib	238.7	239.78	217.54	207.76	204.28	212.56
	1	Post-LC celecoxib	201.7	168.4	151.36	166.56	158.96	156.54
	2	Post-LC celecoxib	241.76	197.48	186.16	189.76	194.6	176.4
	3	Post-LC celecoxib	211.18	189.72	178.18	169.18	168.28	180.62
	4	Post-LC celecoxib	205.32	162.62	165.6	160.66	164.84	171.4
	5	Post-LC celecoxib	221.96	161.26	156.38	151.52	173.76	171.9
	6	Post-LC celecoxib	234.8	187.16	185.42	187.86	191.92	184.74
