# Supplementary material for: Nonsteroidal anti-inflammatory drugs and acetaminophen ameliorate muscular mechanical hyperalgesia developed after lengthening contractions via cyclooxygenase-2 independent mechanisms in rats
Source: PLoS One. 2019 Nov 6;14(11):e0224809. doi: 10.1371/journal.pone.0224809 (PMC6834261; doi:10.1371/journal.pone.0224809)
Supplement: S3 Table — (XLSX) [file pone.0224809.s003.xlsx]

## Sheet: Sheet1
	Rats	Groups	Hours after drug administration
			Pre	0	1	2	3	4
	1	ASA 75 mg	216.98	170.12	156.2	159.6	199.86	150.92
	2	ASA 75 mg	222.04	174.08	178.52	167.76	195.74	169.3
	3	ASA 75 mg	210.8	158.52	182.9	176.46	165.84	162.36
	4	ASA 75 mg	219.32	173.5	182.22	183.54	184.2	190.94
	5	ASA 75 mg	214.22	151.4	170.26	182.78	171.5	169.4
	6	ASA 75 mg	209.34	169.58	164.26	170.64	174.42	159.04
	1	ASA 225 mg	195.4	145.9	182.02	174.28	177.2	172.9
	2	ASA 225 mg	236.64	174.98	199.56	230.14	203.56	179.68
	3	ASA 225 mg	225.54	174.12	192.2	200.6	193.54	168.24
	4	ASA 225 mg	249.84	166.26	177.1	174.72	163.92	165.84
	5	ASA 225 mg	235.16	190.92	193.5	167.56	180.9	166.26
	6	ASA 225 mg	210.18	158.66	190.84	184.26	189.8	194.94
	1	ASA 375 mg	178.86	158.96	242.8	215.62	208.6	184.78
	2	ASA 375 mg	201.52	162.96	197.74	158.72	177.68	154.94
	3	ASA 375 mg	212.3	149.1	198.8	170.12	200.16	170.52
	4	ASA 375 mg	224.28	174.48	175.86	190.38	188.3	172.96
	5	ASA 375 mg	258.22	169.96	164.54	162.36	154.1	173.22
	6	ASA 375 mg	212.06	168	220.74	220.28	202.724	168.2
	1	IBP 20 mg	217.4	167.5	177.1	182.26	178.96	184.84
	2	IBP 20 mg	260.14	198.46	205.06	200.2	203.44	182.36
	3	IBP 20 mg	207.3	169.34	170.64	185.2	173.28	187.76
	4	IBP 20 mg	203.5	174.96	187.56	188.18	194.4	184.8
	5	IBP 20 mg	204.76	157.76	187.6	174.12	170.82	160.6
	6	IBP 20 mg	244.12	187.38	210.96	206.06	210.52	188.06
	1	IBP 60 mg	235.12	192.04	202.18	223.22	211.62	199.68
	2	IBP 60 mg	222.06	169.3	183.3	180.96	195.46	188.76
	3	IBP 60 mg	222.76	185.32	197.56	209.54	204.18	195.98
	4	IBP 60 mg	221.12	186.94	194.72	191.04	203.06	197.66
	5	IBP 60 mg	205.66	167	173.52	181.7	184.9	181.8
	6	IBP 60 mg	222.1	159.62	182.54	194.14	187.48	161.76
	1	IBP 100 mg	213.96	189.26	214.04	184.14	174.22	186.46
	2	IBP 100 mg	203.4	153.18	184.54	184.06	187.34	204
	3	IBP 100 mg	198.06	150.26	190.64	174.58	176.98	164.7
	4	IBP 100 mg	199.12	136.24	186.54	181.64	162.1	158.52
	5	IBP 100 mg	195.88	166.26	181.18	160.26	170	191.78
	6	IBP 100 mg	208.68	163.1	192.66	185.34	187.08	164.32
	1	LOX 6.81 mg	244.54	183.1	255.8	229	237.86	215.64
	2	LOX 6.81 mg	208.22	176.12	176.9	192.58	178.3	195.42
	3	LOX 6.81 mg	205.56	171.58	182.78	173.04	177.64	162.24
	4	LOX 6.81 mg	213.18	181.52	236	216.54	212.3	205.68
	5	LOX 6.81 mg	242.48	183.92	193.46	173.5	191.24	194.76
	6	LOX 6.81 mg	211.6	172	177.64	185.86	182.88	194.36
	1	LOX 20.4 mg	233.68	179.66	194.86	220.36	237.66	211.2
	2	LOX 20.4 mg	241.36	177.9	171.66	190.4	201.96	179.8
	3	LOX 20.4 mg	217.16	161.18	200.6	195.9	195.22	197.48
	4	LOX 20.4 mg	222.02	167.1	189	210.16	195.56	174.36
	5	LOX 20.4 mg	215.26	180.8	186.72	183.74	204.4	188.3
	6	LOX 20.4 mg	229.2	170.72	192.66	177.06	191.88	192.96
	1	LOX 34.1 mg	188.98	164.86	192.16	198.26	182.04	180.78
	2	LOX 34.1 mg	201.98	171.16	234.16	210.46	204.46	203.12
	3	LOX 34.1 mg	199.28	148.22	159.68	197.9	196.54	194.16
	4	LOX 34.1 mg	222.12	156.42	186.3	173.82	166.08	167.78
	5	LOX 34.1 mg	222.08	169.9	218.56	182.78	180.68	176.84
	6	LOX 34.1 mg	218.22	154.36	185.34	191.14	193.34	201.38
	1	APAP 30 mg	232.58	166.12	164.82	178.74	154.92	169.14
	2	APAP 30 mg	219.96	176.9	183.58	198.38	191	192.14
	3	APAP 30 mg	224.62	180.98	191.9	178.08	165.2	169.72
	4	APAP 30 mg	204.32	180.64	173.6	184.9	166.88	183.82
	5	APAP 30 mg	205.52	152.5	160.24	159.56	160.24	166.32
	6	APAP 30 mg	225.64	178.58	167.7	160.16	163.56	160.1
	1	APAP 90 mg	210.68	168.12	211.94	172.6	202.86	181.08
	2	APAP 90 mg	213.02	161.2	176.4	180.54	176.7	167.02
	3	APAP 90 mg	223.94	186.52	204.24	187.64	187.44	201.48
	4	APAP 90 mg	218.66	182.02	184.78	186.7	174.36	180.58
	5	APAP 90 mg	247.8	187.14	211.42	188.66	188.78	178.1
	6	APAP 90 mg	204.22	166.24	171.48	176.38	168.08	181.24
	1	APAP 150 mg	220.88	164.22	188.78	205.6	194.58	174.86
	2	APAP 150 mg	189.02	156.36	179.76	195.08	182.1	161.54
	3	APAP 150 mg	218.88	178.36	177.1	159.62	159.58	176.08
	4	APAP 150 mg	193.36	150.78	163.78	194.16	156.78	158.36
	5	APAP 150 mg	255.52	166.22	213.52	173.04	170.36	199.38
	6	APAP 150 mg	198.68	149.5	175.58	173.52	178.9	170.52
	1	Vehicle	236.82	171.48	204.9	162.48	166.08	176.14
	2	Vehicle	213.08	177.82	171.54	189.42	172.46	169.26
	3	Vehicle	221.34	173.88	154.44	160.26	174.2	162.74
	4	Vehicle	196.1	163.04	156.52	182.32	160.98	169.42
	5	Vehicle	203.3	164.62	178.28	170.68	155.62	169.94
	6	Vehicle	238.48	172.3	181.56	167.72	167.08	176.98
	7	Vehicle	233.12	166.32	155.62	157.52	154.34	168.04
	8	Vehicle	206.16	156.94	158.8	163.7	170.04	176.16
	9	Vehicle	224	162.76	166.64	173.46	176.14	178.3
	10	Vehicle	240.66	176.32	171.74	172.1	175.3	183.2
	11	Vehicle	247.94	196.86	184.5	187.98	193.04	183.36
	12	Vehicle	207.94	164.72	174.54	153.1	151.28	166.72
	13	Vehicle	173.16	165.4	170.18	166.32	165.74	153.82
	14	Vehicle	210.26	168.64	172.66	171.68	149.8	164.66
	15	Vehicle	216.4	153.86	179	151.84	151.06	150
	16	Vehicle	211.44	161.86	186.46	179	187.62	173.02
	17	Vehicle	219.78	156.2	156.3	163.76	164.48	163.3
	18	Vehicle	215.28	150.22	145.02	157.32	155.54	156.26
	19	Vehicle	222.62	180.42	172.46	159.9	168.58	164.76
	20	Vehicle	232.54	171.86	177.5	187.06	183.74	171.88
	21	Vehicle	224.56	189.74	175.92	169.68	185.48	164.58
	22	Vehicle	209.82	156.54	153.28	158.58	165.16	176.66
	23	Vehicle	210.68	162.64	152.78	162.6	151.48	171.78
	24	Vehicle	221.3	187.66	186.58	165.06	171.02	169.04
	25	Vehicle	213.78	170.44	170.38	169.22	160.16	174.08
	26	Vehicle	216	173.92	178.52	177.38	169.4	176.5
	27	Vehicle	243.06	206.02	200.6	187.9	186.72	192.38
	28	Vehicle	210.56	163.72	171.5	169.12	175.32	169.08
	29	Vehicle	219.22	184.48	162.18	159.82	163.32	166.02
	30	Vehicle	213.56	159.34	163.82	160.7	158.4	168.2
	31	Vehicle	184.8	158.7	151.84	156.94	147.48	152.06
	32	Vehicle	217.34	161.44	153.62	144.88	150.1	154.86
	33	Vehicle	199.22	165.18	154.42	158.86	154.36	176.82
	34	Vehicle	221.76	160.26	148.24	143.82	143.54	147.02
	35	Vehicle	192.44	146.94	133.42	157.86	148.14	146.62
	36	Vehicle	209.64	143.44	160.98	171.24	135	154.78
