# Supplementary material for: Nonsteroidal anti-inflammatory drugs and acetaminophen ameliorate muscular mechanical hyperalgesia developed after lengthening contractions via cyclooxygenase-2 independent mechanisms in rats
Source: PLoS One. 2019 Nov 6;14(11):e0224809. doi: 10.1371/journal.pone.0224809 (PMC6834261; doi:10.1371/journal.pone.0224809)
Supplement: S4 Table — (XLSX) [file pone.0224809.s004.xlsx]

## Sheet: Sheet1
	Rats	Groups	AUC
	1	ASA 75 mg	-4.3
	2	ASA 75 mg	17.39
	3	ASA 75 mg	51.56
	4	ASA 75 mg	38.18
	5	ASA 75 mg	79.34
	6	ASA 75 mg	-4.69
	1	ASA 225 mg	109.3
	2	ASA 225 mg	110.67
	3	ASA 225 mg	61.04
	4	ASA 225 mg	16.75
	5	ASA 225 mg	-43.13
	6	ASA 225 mg	107.06
	1	ASA 375 mg	203.05
	2	ASA 375 mg	41.25
	3	ASA 375 mg	132.49
	4	ASA 375 mg	30.34
	5	ASA 375 mg	-27.25
	6	ASA 375 mg	139.844
	1	IBP 20 mg	44.49
	2	IBP 20 mg	5.27
	3	IBP 20 mg	30.31
	4	IBP 20 mg	50.18
	5	IBP 20 mg	60.68
	6	IBP 20 mg	65.74
	1	IBP 60 mg	64.72
	2	IBP 60 mg	61.55
	3	IBP 60 mg	60.65
	4	IBP 60 mg	33.36
	5	IBP 60 mg	46.52
	6	IBP 60 mg	86.37
	1	IBP 100 mg	3.22
	2	IBP 100 mg	121.81
	3	IBP 100 mg	98.64
	4	IBP 100 mg	132.7
	5	IBP 100 mg	25.42
	6	IBP 100 mg	76.39
	1	LOX 6.81 mg	189.63
	2	LOX 6.81 mg	29.07
	3	LOX 6.81 mg	14.05
	4	LOX 6.81 mg	132.36
	5	LOX 6.81 mg	11.86
	6	LOX 6.81 mg	41.56
	1	LOX 20.4 mg	129.67
	2	LOX 20.4 mg	31.27
	3	LOX 20.4 mg	126.33
	4	LOX 20.4 mg	97.05
	5	LOX 20.4 mg	36.21
	6	LOX 20.4 mg	60.56
	1	LOX 34.1 mg	85.84
	2	LOX 34.1 mg	151.58
	3	LOX 34.1 mg	132.43
	4	LOX 34.1 mg	62.62
	5	LOX 34.1 mg	75.79
	6	LOX 34.1 mg	130.25
	1	APAP 30 mg	1.63
	2	APAP 30 mg	49.88
	3	APAP 30 mg	-13.39
	4	APAP 30 mg	-14.95
	5	APAP 30 mg	29.45
	6	APAP 30 mg	-53.56
	1	APAP 90 mg	89.52
	2	APAP 90 mg	52.95
	3	APAP 90 mg	27.24
	4	APAP 90 mg	-0.94
	5	APAP 90 mg	22.92
	6	APAP 90 mg	24.72
	1	APAP 150 mg	101.62
	2	APAP 150 mg	90.45
	3	APAP 150 mg	-39.92
	4	APAP 150 mg	66.17
	5	APAP 150 mg	74.84
	6	APAP 150 mg	90.01
	1	Vehicle	21.35
	2	Vehicle	-4.32
	3	Vehicle	-38.31
	4	Vehicle	13.89
	5	Vehicle	13.38
	6	Vehicle	1.8
	7	Vehicle	-30.62
	8	Vehicle	31.33
	9	Vehicle	35.73
	10	Vehicle	-6.38
	11	Vehicle	-31.81
	12	Vehicle	-14.24
	13	Vehicle	0.25
	14	Vehicle	-13.77
	15	Vehicle	18.39
	16	Vehicle	73.08
	17	Vehicle	19.49
	18	Vehicle	10.24
	19	Vehicle	-48.15
	20	Vehicle	32.73
	21	Vehicle	-50.72
	22	Vehicle	17.46
	23	Vehicle	-16.49
	24	Vehicle	-49.63
	25	Vehicle	-9.74
	26	Vehicle	4.83
	27	Vehicle	-49.66
	28	Vehicle	27.46
	29	Vehicle	-77.35
	30	Vehicle	9.33
	31	Vehicle	-23.16
	32	Vehicle	-39.01
	33	Vehicle	-22.08
	34	Vehicle	-51.8
	35	Vehicle	-1.56
	36	Vehicle	42.57
